# Supplementary material for: Lymphocyte-to-monocyte ratio and risk of hemorrhagic transformation in patients with acute ischemic stroke
Source: Springer Nature journal article supplement (doi:10.1007/s10072-020-04355-z), 2020-03-25

**Lymphocyte-to-monocyte Ratio and Risk of Hemorrhagic Transformation in Patients with Acute Ischemic Stroke**

Quhong Song1, Ruosu Pan2, Yuxi Jin2, Yanan Wang1, Yajun Cheng1, Junfeng Liu1, Bo Wu1* and Ming Liu1*

1Department of Neurology, West China Hospital, Sichuan University, No.37 Guo Xue Xiang, Chengdu, 610041, Sichuan Province, China

2West China School of Medicine, Sichuan University, No.17 Section 3, People's South Road, Chengdu, 610041, Sichuan Province, China

* Correspondence to Professor Ming Liu, Department of Neurology, West China Hospital, Sichuan University, No.37 Guo Xue Xiang, Chengdu, 610041, Sichuan Province, China (Tel: +86 18980601671; Fax: +86 02885423551; E-mail: [wyplmh@hotmail.com](mailto:wyplmh@hotmail.com)), or Professor Bo Wu, Department of Neurology, West China Hospital, Sichuan University, No.37 Guo Xue Xiang, Chengdu, 610041, Sichuan Province, China (Tel: +86 18980602142; Fax: +86 02885423551; Email [dragonwb@126.com](mailto:dragonwb@126.com)).

**Supplementary Table 1** Demographic and clinical characteristics of the included and excluded patients

| Characteristics | Patients included  N=1005 | Patients excluded  N=338 | *P* | Healthy controls  n=100 |
| --- | --- | --- | --- | --- |
| Age, mean (SD ) | 63.0 (14.6) | 65.1 (13.6) | 0.125 | 64.8 (15.9) |
| Male, n (%) | 651 (64.8) | 204 (60.4) | 0.144 | 60 (60.0) |
| Hypertension, n (%) | 523 (52.0) | 190 (56.2) | 0.184 |  |
| Diabetes, n (%) | 231 (23.0) | 63 (18.6) | 0.095 |  |
| Dyslipidemia, n (%) | 39 (3.9) | 10 (3.0) | 0.434 |  |
| AF, n (%) | 91 (9.1) | 53 (15.7) | 0.001 |  |
| Prior stroke or TIA, n (%) | 175 (17.4) | 60 (17.8) | 0.887 |  |
| Smoking, n (%) | 432 (43.0) | 127 (37.6) | 0.081 |  |
| Alcohol consumption, n (%) | 321 (31.9) | 86 (25.4) | 0.025 |  |
| Baseline NIHSS, median (IQR ) | 4 (2-9) | 10 (4-17) | <0.001a |  |
| SBP, mmHg, mean (SD ) | 146.18 (23.57) | 142.04 (22.87) | 0.005 |  |
| DBP, mmHg, mean (SD ) | 85.78 (14.41) | 82.48 (14.43) | <0.001 |  |
| Platelet, mean (SD ) | 176.03 (63.46) | 172.55 (92.97) | 0.523 |  |
| Lymphocyte, mean (SD ) | 1.51 (0.68) | 1.32 (0.64) | <0.001 |  |
| Monocyte, mean (SD ) | 0.40 (0.18) | 0.45 (0.19) | <0.001 |  |
| PLR, mean (SD ) | 137.40 (78.13) | 154.28 (104.80) | 0.002 |  |
| LMR, median (IQR ) | 3.89 (2.81-5.30) | 2.89 (2.07-4.20) | <0.001a | 4.36 (3.16-5.59) |
| Glucose, mmol/L, mean (SD ) | 8.09 (3.61) | 7.87 (3.09) | 0.302 |  |
| Creatinine, umol/L, mean (SD ) | 81.69 (46.70) | 82.33 (37.48) | 0.820 |  |

AF, atrial fibrillation; TIA, transient ischemic attack; NIHSS, National Institutes of Health Stroke Scale; SBP, systolic blood pressure; DBP, diastolic blood pressure; PLR, platelet-to-lymphocyte ratio; LMR, lymphocyte-to-monocyte ratio; SD, standard deviation; IQR, interquartile range;

a Mann-Whitney U test;

**Supplementary Table 2** Characteristics of patients with and without PH

| **Characteristics** | Without PH  N=957 | With PH  N=48 | *P* |
| --- | --- | --- | --- |
| Age, mean (SD ) | 62.8 (14.7) | 66.7 (13.4) | 0.073 |
| Male, n (%) | 627 (65.5) | 24 (50.0) | 0.028 |
| Time from stroke onset to admission, hours, median (IQR) | 48 (10-96) | 9.5 (4-48) | 0.002 |
| Hypertension, n (%) | 505 (52.8) | 18 (37.5) | 0.039 |
| Diabetes, n (%) | 222 (23.2) | 9 (18.8) | 0.475 |
| Dyslipidemia, n (%) | 39 (4.1) | 0 (0.0) | 0.297 |
| AF, n (%) | 80 (8.4) | 11 (22.9) | 0.002 |
| Prior stroke or TIA, n (%) | 169 (17.7) | 6 (12.5) | 0.358 |
| Previous antiplatelet, n (%) | 71 (7.4) | 3 (6.3) | 0.797 |
| Smoking, n (%) | 416 (43.5) | 16 (33.3) | 0.166 |
| Alcohol consumption, n (%) | 309 (32.3) | 12 (25.0) | 0.291 |
| Baseline NIHSS, median (IQR ) | 4 (2-9) | 11 (8-17) | <0.001a |
| SBP, mmHg, mean (SD ) | 146.47 (23.70) | 140.54 (20.38) | 0.089 |
| DBP, mmHg, mean (SD ) | 85.78 (14.40) | 85.81 (14.80) | 0.988 |
| Platelet, mean (SD ) | 176.80 (63.19) | 160.85 (67.44) | 0.089 |
| Lymphocyte, mean (SD ) | 1.53 (0.68) | 1.31 (0.61) | 0.028 |
| Monocyte, mean (SD ) | 0.40 (0. 18) | 0.40 (0.19) | 0.954 |
| PLR, mean (SD ) | 136.88 (77.76) | 147.61 (85.55) | 0.354 |
| LMR, median (IQR ) | 3.91 (2.86-5.30) | 3.28 (2.27-4.54) | 0.030a |
| LMR tertiles |  |  | 0.069 |
| 1st tertile, n (%) | 308 (93.1) | 23 (6.9) |  |
| 2nd tertile, n (%) | 329 (95.9) | 14 (4.1) |  |
| 3rd tertile, n (%) | 320 (96.7) | 11 (3.3) |  |
| Glucose, mmol/L, mean (SD ) | 8.10 (3.67) | 7.85 (2.01) | 0.420 |
| Creatinine, umol/L, mean (SD ) | 82.09 (47.28) | 73.81 (32.58) | 0.231 |
| **TOAST classification, n (%)** |  |  | <0.001 |
| Large-artery atherosclerosis | 317 (33.1) | 12 (25.0) |  |
| Small-artery occlusion | 246 (25.7) | 1 (2.1) |  |
| Cardio-embolism | 142 (14.8) | 22 (45.8) |  |
| Undetermined etiology | 220 (23.0) | 11 (22.9) |  |
| Other etiology | 32 (3.3) | 2 (4.2) |  |
| **Treatment after admission, n (%)** |  |  |  |
| Antiplatelet | 916 (95.7) | 36 75.0) | <0.001 |
| Lipid lowering | 916 (95.7) | 42 (87.5) | 0.023 |
| Anticoagulant | 94 (9.8) | 10 (20.8) | 0.028 |
| Reperfusion therapy | 61 (6.4) | 13 (27.1) | <0.001 |

PH, parenchymal hematoma; AF, atrial fibrillation; TIA, transient ischemic attack; NIHSS, National Institutes of Health Stroke Scale; SBP, systolic blood pressure; DBP, diastolic blood pressure; PLR, platelet-to-lymphocyte ratio; LMR, lymphocyte-to-monocyte ratio; TOAST, Trial of ORG 10172 in Acute Stroke Treatment; SD, standard deviation; IQR, interquartile range; Reperfusion therapy refers to thrombosis and endovascular therapy. For LMR levels: Tertile 1: ≤3.116, Tertile 2: 3.117-4.760, Tertile 3: ≥4.761.

a Mann-Whitney U test;

**Supplementary Table 3** Multivariate logistic analysis to identify the association between LMR levels and PH

|  | Unadjusted |  | Model 1 |  | Model 2 |  | Model 3 |  |
| --- | --- | --- | --- | --- | --- | --- | --- | --- |
| OR (95%CI) | *P* | OR (95%CI) | *P* | OR (95%CI) | *P* | OR (95%CI) | *P* |
| LMR per1-unit increase | 0.830 (0.699-0.986) | 0.034 | 0.802 (0.673-0.956) | 0.014 | 0.853 (0.720-1.010) | 0.066 | 0.860 (0.727-1.017) | 0.078 |
| LMR Tertile 1 | Reference |  | Reference |  | Reference |  | Reference |  |
| Tertile 2 | 0.570 (0.288-1.127) | 0.106 | 0.549 (0.275-1.094) | 0.088 | 0.689 (0.333-1.423 | 0.314 | 0.698 (0.326-1.494) | 0.354 |
| Tertile 3 | 0.460 (0.221-0.960) | 0.039 | 0.407 (0.192-0.862) | 0.019 | 0.512(0.233-1.126) | 0.096 | 0.562 (0.249-1.268) | 0.165 |

PH, parenchymal hematoma; LMR, lymphocyte-to-monocyte ratio; OR, odds ratio; CI, confidence interval; Model 1 adjusted for age and sex; Model 2, Model 1+ time from stroke onset to admission, platelet, systolic blood pressure, atrial fibrillation, previous antiplatelet, baseline NIHSS score and TOAST classification; Model 3, Model 2+antiplatelet, lipid-lowering, anticoagulant and reperfusion therapy after admission. For LMR levels: Tertile 1: ≤3.116, Tertile 2: 3.117-4.760, Tertile 3: ≥4.761.

**Supplementary Table 4** Baseline characteristics of the previous studies on LMR in patients with stroke

| Author | Patients | Onset to admission time | Sample size | Time of blood collection | Average  age (y) | Male (%) | LMR, median(IQR) | Outcome |
| --- | --- | --- | --- | --- | --- | --- | --- | --- |
| Park (2017) | AIS | Within 24h | 102 | Day 1 and day 7 | 63 | 53(52.0%) | Day1:  Excellent outcome group: 4.58 ±3.18, non- Excellent outcome group: 3.91±1.86;  Day7:  Excellent outcome group: 3.89 ±1.83, non- Excellent outcome group: 2.72±1.32; | 3-month excellent outcome (mRS 0-1), post-stroke infection (pneumonia and urinary tract infection |
| Ren (2017) | AIS with thrombolysis | Median(IQR):  2.5(2.0-3.0) h | 108 | On admission | 56 | 76(70.4%) | 3.5(2.5-5.4) | Stroke severity, 3-month adverse prognosis (mRS ≥3), sICH (10.2%) |
| Ren (2017) | AIS | Within 72h | 512 | Within 24h after admission | 61 | 314(61.3%) | 3.8(2.5-5.4) | Stroke severity, 3-month poor outcome (mRS ≥3), |
| Switonska (2019) | AIS | NA | 58 | Within 24h after interventions or after stroke diagnosis | 67 | 29(50.0%) | NA | Stroke severity, ischemic stroke comorbidities |
| Qi (2018) | Spontaneous intracerebral hemorrhage | NA | 558 | Within 24h after stroke onset | 57.6 | 368(65.9%) | Neurological deterioration (ND) group: 2.06±1.95, Non-ND group: 3.49±2.37 | Neurological deterioration, 3-month mortality |
| Li (2018) | Cerebral venous sinus thrombosis | NA | 228 | Within 12h after admission | 35.2 | 94(41.2%) | Poor outcome group: 2.3±1.2, good outcome group: 3.2±1.8 | Poor outcomes and death (mRS 3-6) |

AIS: acute ischemic stroke; LMR, lymphocyte to monocyte ratio; IQR, interquartile range; NA, not available; mRS, modified Rankin Scale; sICH, symptomatic intracranial hemorrhage; ND, neurological deterioration.

**Supplementary Figure 1** LMR levels in patients grouped by onset to admission time.

**
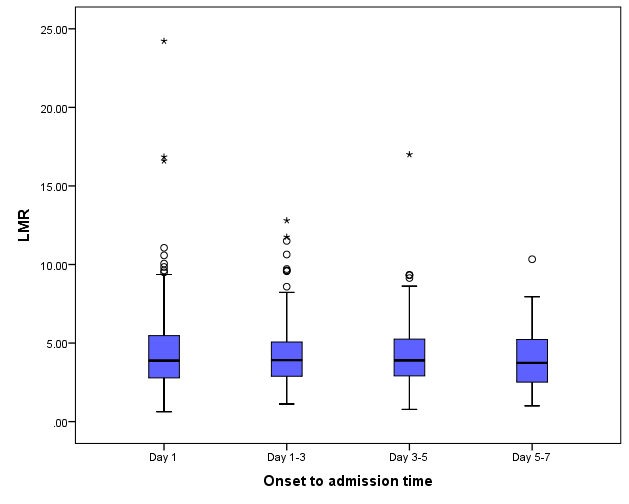
**

**Supplementary Figure 2** LMR levels in different HT subtypes classified according to the European Cooperative Acute Stroke Study (ECASS) criteria


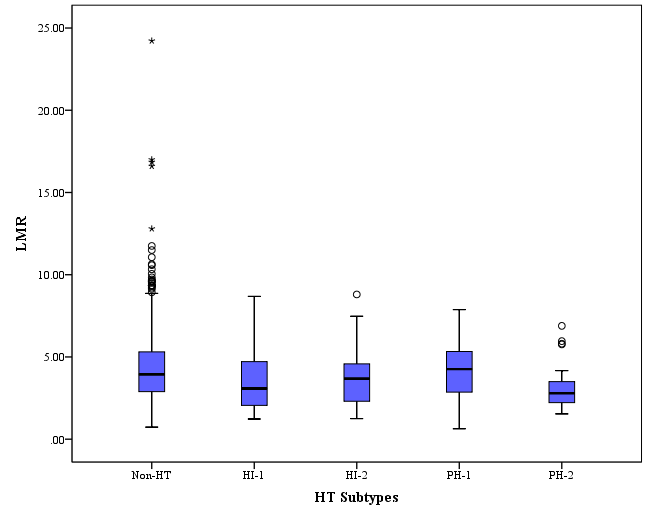

Supplement: MOESM1 [file 17832046]
